# Supplementary material for: Reynolds-number dependence of turbulence enhancement on collision growth
Source: Copernicus journal article supplement (doi:10.5194/acp-16-12441-2016), 2016-10-05
Supplement: Supplementary file [file acp-16-12441-2016-supplement-title-page.pdf › acp-16-12441-2016-supplement-title-page.pdf]

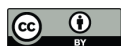

## *Supplement of*

# **Reynolds-number dependence of turbulence enhancement on collision growth**

**Ryo Onishi and Axel Seifert**

*Correspondence to:* Ryo Onishi ([onishi.ryo@jamstec.go.jp](mailto:onishi.ryo@jamstec.go.jp))

- [acp-16-12441-2016-supplement-title-page.pdf](#)
- [updated\\_onishi\\_model.f90](#)

The copyright of individual parts of the supplement might differ from the CC-BY 3.0 licence.
